# Supplementary material
Source: MDPI journal article supplement (https://www.mdpi.com/2073-445X/11/8/1171)
Supplement: s1 [file s1]

## Appendix C: P-value tables for the statistical analysis of the insect data

### SUMMER PITFALL Multiple comparisons P-values

#### 1. Abundance

| Depend.:<br><b>Abundance</b> | Multiple Comparisons p values (2-tailed); <b>Abundance</b> (Summer Pitfall Traps Data)<br>Independent (grouping) variable: Garden Type<br>Kruskal-Wallis test: H (5, N= 42) =36,57295 p = 0,0001 |                      |                        |                        |                     |                             |
|------------------------------|--------------------------------------------------------------------------------------------------------------------------------------------------------------------------------------------------|----------------------|------------------------|------------------------|---------------------|-----------------------------|
|                              | Grassland<br>R: 32,286                                                                                                                                                                           | Monocot<br>R: 38,714 | FA Control<br>R: 8,000 | FA Native<br>R: 25,000 | Javett<br>R: 9,6429 | Javett Control<br>R: 15,357 |
| Grassland                    |                                                                                                                                                                                                  | 1,000000             | 0,003189               | 1,000000               | 0,008316            | 0,147523                    |
| Monocot                      | 1,000000                                                                                                                                                                                         |                      | 0,000042               | 0,547371               | 0,000139            | 0,005522                    |
| FA Control                   | 0,003189                                                                                                                                                                                         | 0,000042             |                        | 0,142932               | 1,000000            | 1,000000                    |
| FA Native                    | 1,000000                                                                                                                                                                                         | 0,547371             | 0,142932               |                        | 0,287755            | 1,000000                    |
| Javett                       | 0,008316                                                                                                                                                                                         | 0,000139             | 1,000000               | 0,287755               |                     | 1,000000                    |
| Javett Control               | 0,147523                                                                                                                                                                                         | 0,005522             | 1,000000               | 1,000000               | 1,000000            |                             |

#### 2. Richness

| Depend.:<br><b>Richness</b> | Multiple Comparisons p values (2-tailed); <b>Richness</b> (Summer Pitfall Traps Data)<br>Independent (grouping) variable: Garden Type<br>Kruskal-Wallis test: H (5, N= 42) =27,78177 p = 0,0001 |                      |                         |                        |                     |                             |
|-----------------------------|-------------------------------------------------------------------------------------------------------------------------------------------------------------------------------------------------|----------------------|-------------------------|------------------------|---------------------|-----------------------------|
|                             | Grassland<br>R: 32,071                                                                                                                                                                          | Monocot<br>R: 28,643 | FA Control<br>R: 8,2857 | FA Native<br>R: 31,429 | Javett<br>R: 9,2143 | Javett Control<br>R: 19,357 |
| Grassland                   |                                                                                                                                                                                                 | 1,000000             | 0,004296                | 1,000000               | 0,007363            | 0,787684                    |
| Monocot                     | 1,000000                                                                                                                                                                                        |                      | 0,028596                | 0,547371               | 0,045724            | 1,000000                    |
| FA Control                  | 0,004296                                                                                                                                                                                        | 0,028596             |                         | 0,006251               | 1,000000            | 1,000000                    |
| FA Native                   | 1,000000                                                                                                                                                                                        | 1,000000             | 0,006251                |                        | 0,010574            | 0,984597                    |
| Javett                      | 0,007363                                                                                                                                                                                        | 0,045724             | 1,000000                | 0,010574               |                     | 1,000000                    |
| Javett Control              | 0,787684                                                                                                                                                                                        | 1,000000             | 1,000000                | 0,984597               | 1,000000            |                             |

#### 3. Shannon Diversity

| Depend.:<br><b>Shannon Diversity</b> | Multiple Comparisons p values (2-tailed); <b>Shannon diversity</b> (Summer Pitfall Traps Data)<br>Independent (grouping) variable: Garden Type<br>Kruskal-Wallis test: H (5, N= 42) =29,96326 p = 0,0001 |                     |                         |                        |                     |                             |
|--------------------------------------|----------------------------------------------------------------------------------------------------------------------------------------------------------------------------------------------------------|---------------------|-------------------------|------------------------|---------------------|-----------------------------|
|                                      | Grassland<br>R: 12,143                                                                                                                                                                                   | Monocot<br>R: 5,000 | FA Control<br>R: 21,714 | FA Native<br>R: 34,286 | Javett<br>R: 23,571 | Javett Control<br>R: 32,386 |
| Grassland                            |                                                                                                                                                                                                          | 1,000000            | 1,000000                | 0,011002               | 1,000000            | 0,031920                    |
| Monocot                              | 1,000000                                                                                                                                                                                                 |                     | 0,162093                | 0,000120               | 0,069362            | 0,000475                    |
| FA Control                           | 1,000000                                                                                                                                                                                                 | 0,162093            |                         | 0,828331               | 1,000000            | 1,000000                    |
| FA Native                            | 0,011002                                                                                                                                                                                                 | 0,000120            | 0,828331                |                        | 1,000000            | 1,000000                    |
| Javett                               | 1,000000                                                                                                                                                                                                 | 0,069362            | 1,000000                | 1,000000               |                     | 1,000000                    |
| Javett Control                       | 0,031920                                                                                                                                                                                                 | 0,000475            | 1,000000                | 1,000000               | 1,000000            |                             |

#### 4. Simpson Diversity

| Depend.:<br><b>Simpson Diversity</b> | Multiple Comparisons p values (2-tailed); <b>Simpson diversity</b> (Summer Pitfall Traps Data)<br>Independent (grouping) variable: Garden Type<br>Kruskal-Wallis test: H (5, N= 42) =29,21499 p = 0,0001 |                     |                         |                        |                     |                             |
|--------------------------------------|----------------------------------------------------------------------------------------------------------------------------------------------------------------------------------------------------------|---------------------|-------------------------|------------------------|---------------------|-----------------------------|
|                                      | Grassland<br>R: 10,714                                                                                                                                                                                   | Monocot<br>R: 4,714 | FA Control<br>R: 27,214 | FA Native<br>R: 23,857 | Javett<br>R: 30,357 | Javett Control<br>R: 32,143 |
| Grassland                            |                                                                                                                                                                                                          | 1,000000            | 0,177928                | 0,675622               | 0,041098            | 0,016257                    |
| Monocot                              | 1,000000                                                                                                                                                                                                 |                     | 0,009013                | 0,052630               | 0,001382            | 0,000432                    |
| FA Control                           | 0,177928                                                                                                                                                                                                 | 0,009013            |                         | 1,000000               | 1,000000            | 1,000000                    |
| FA Native                            | 0,675622                                                                                                                                                                                                 | 0,052630            | 1,000000                |                        | 1,000000            | 1,000000                    |
| Javett                               | 0,041098                                                                                                                                                                                                 | 0,001382            | 1,000000                | 1,000000               |                     | 1,000000                    |
| Javett Control                       | 0,016257                                                                                                                                                                                                 | 0,000432            | 1,000000                | 1,000000               | 1,000000            |                             |

## WINTER PITFALL Multiple Comparisons p-values

### 1. Abundance

| Depend.:<br><b>Abundance</b> | Multiple Comparisons p values (2-tailed); <b>Abundance</b> (Winter Pitfall Traps Data)<br>Independent (grouping) variable: Garden Type<br>Kruskal-Wallis test: H (5, N= 42) =37,00053 p = 0,0001 |                      |                         |                        |                     |                             |
|------------------------------|--------------------------------------------------------------------------------------------------------------------------------------------------------------------------------------------------|----------------------|-------------------------|------------------------|---------------------|-----------------------------|
|                              | Grassland<br>R: 30,571                                                                                                                                                                           | Monocot<br>R: 39,000 | FA Control<br>R: 9,7143 | FA Native<br>R: 20,929 | Javett<br>R: 23,500 | Javett Control<br>R: 5,2857 |
| Grassland                    |                                                                                                                                                                                                  | 1,000000             | 0,022039                | 1,000000               | 1,000000            | 0,001729                    |
| Monocot                      | 1,000000                                                                                                                                                                                         |                      | 0,000120                | 0,087805               | 0,271381            | 0,000004                    |
| FA Control                   | 0,022039                                                                                                                                                                                         | 0,000120             |                         | 1,000000               | 0,532903            | 1,000000                    |
| FA Native                    | 1,000000                                                                                                                                                                                         | 0,087805             | 1,000000                |                        | 1,000000            | 0,255830                    |
| Javett                       | 1,000000                                                                                                                                                                                         | 0,271381             | 0,532903                | 1,000000               |                     | 0,082130                    |
| Javett Control               | 0,001729                                                                                                                                                                                         | 0,000004             | 1,000000                | 0,255830               | 0,082130            |                             |

### 2. Richness

| Depend.:<br><b>Richness</b> | Multiple Comparisons p values (2-tailed); <b>Richness</b> (Winter Pitfall Traps Data)<br>Independent (grouping) variable: Garden Type<br>Kruskal-Wallis test: H (5, N= 42) =32,10927 p = 0,0001 |                      |                         |                        |                     |                             |
|-----------------------------|-------------------------------------------------------------------------------------------------------------------------------------------------------------------------------------------------|----------------------|-------------------------|------------------------|---------------------|-----------------------------|
|                             | Grassland<br>R: 20,500                                                                                                                                                                          | Monocot<br>R: 35,786 | FA Control<br>R: 11,429 | FA Native<br>R: 33,500 | Javett<br>R: 21,643 | Javett Control<br>R: 6,1429 |
| Grassland                   |                                                                                                                                                                                                 | 0,296261             | 1,000000                | 0,711381               | 1,000000            | 0,428469                    |
| Monocot                     | 0,296261                                                                                                                                                                                        |                      | 0,003055                | 1,000000               | 0,465359            | 0,000093                    |
| FA Control                  | 1,000000                                                                                                                                                                                        | 0,003055             |                         | 0,011446               | 1,000000            | 1,000000                    |
| FA Native                   | 0,711381                                                                                                                                                                                        | 1,000000             | 0,011446                |                        | 1,000000            | 0,000453                    |
| Javett                      | 1,000000                                                                                                                                                                                        | 0,465359             | 1,000000                | 1,000000               |                     | 0,271381                    |
| Javett Control              | 0,428469                                                                                                                                                                                        | 0,000093             | 1,000000                | 0,000453               | 0,271381            |                             |

### 3. Shannon Diversity

| Depend.:<br><b>Shannon Diversity</b> | Multiple Comparisons p values (2-tailed); <b>Shannon Diversity</b> (Winter Pitfall Traps Data)<br>Independent (grouping) variable: Garden Type<br>Kruskal-Wallis test: H (5, N= 42) =30,93382 p = 0,0001 |                      |                         |                        |                     |                             |
|--------------------------------------|----------------------------------------------------------------------------------------------------------------------------------------------------------------------------------------------------------|----------------------|-------------------------|------------------------|---------------------|-----------------------------|
|                                      | Grassland<br>R: 16,571                                                                                                                                                                                   | Monocot<br>R: 6,1429 | FA Control<br>R: 23,571 | FA Native<br>R: 39,000 | Javett<br>R: 28,714 | Javett Control<br>R: 15,000 |
| Grassland                            |                                                                                                                                                                                                          | 1,000000             | 1,000000                | 0,009382               | 0,960886            | 1,000000                    |
| Monocot                              | 1,000000                                                                                                                                                                                                 |                      | 0,117968                | 0,000008               | 0,008658            | 1,000000                    |
| FA Control                           | 1,000000                                                                                                                                                                                                 | 0,117968             |                         | 0,279463               | 1,000000            | 1,000000                    |
| FA Native                            | 0,009382                                                                                                                                                                                                 | 0,000008             | 0,279463                |                        | 1,000000            | 0,003784                    |
| Javett                               | 0,960886                                                                                                                                                                                                 | 0,008658             | 1,000000                | 1,000000               |                     | 0,547371                    |
| Javett Control                       | 1,000000                                                                                                                                                                                                 | 1,000000             | 1,000000                | 0,003784               | 0,547371            |                             |

### 4. Simpson Diversity

| Depend.:<br><b>Simpson Diversity</b> | Multiple Comparisons p values (2-tailed); <b>Simpson Diversity</b> (Winter Pitfall Traps Data)<br>Independent (grouping) variable: Garden Type<br>Kruskal-Wallis test: H (5, N= 42) =26,21970 p = 0,0001 |                     |                         |                        |                     |                             |
|--------------------------------------|----------------------------------------------------------------------------------------------------------------------------------------------------------------------------------------------------------|---------------------|-------------------------|------------------------|---------------------|-----------------------------|
|                                      | Grassland<br>R: 13,286                                                                                                                                                                                   | Monocot<br>R: 6,000 | FA Control<br>R: 28,143 | FA Native<br>R: 35,571 | Javett<br>R: 25,143 | Javett Control<br>R: 20,857 |
| Grassland                            |                                                                                                                                                                                                          | 1,000000            | 0,352053                | 0,010162               | 1,000000            | 1,000000                    |
| Monocot                              | 1,000000                                                                                                                                                                                                 |                     | 0,011002                | 0,000097               | 0,052630            | 0,352053                    |
| FA Control                           | 0,352053                                                                                                                                                                                                 | 0,011002            |                         | 1,000000               | 1,000000            | 1,000000                    |
| FA Native                            | 0,010162                                                                                                                                                                                                 | 0,000097            | 1,000000                |                        | 1,000000            | 0,372575                    |
| Javett                               | 1,000000                                                                                                                                                                                                 | 0,052630            | 1,000000                | 1,000000               |                     | 1,000000                    |
| Javett Control                       | 1,000000                                                                                                                                                                                                 | 0,352053            | 1,000000                | 0,372575               | 1,000000            |                             |

## SPRING PITFALL Multiple comparisons p-values

### 1. Abundance

| Depend.:<br><b>Abundance</b> | Multiple Comparisons p values (2-tailed); <b>Abundance</b> (Spring Pitfall Data)<br>Independent (grouping) variable: Garden Type<br>Kruskal-Wallis test: H (5, N= 42) =31,37138 p = 0,0001 |                       |                       |                    |                            |                     |
|------------------------------|--------------------------------------------------------------------------------------------------------------------------------------------------------------------------------------------|-----------------------|-----------------------|--------------------|----------------------------|---------------------|
|                              | FA Control<br>R:7,6429                                                                                                                                                                     | FA Native<br>R:21,143 | Grassland<br>R:21,643 | Javett<br>R:29,000 | Javett Control<br>R:10,571 | Monocot<br>R:39,000 |
| FA Control                   |                                                                                                                                                                                            | 0,592801              | 0,491440              | 0,016893           | 1,000000                   | 0,000026            |
| FA Native                    | 0,592801                                                                                                                                                                                   |                       | 1,000000              | 1,000000           | 1,000000                   | 0,096983            |
| Grassland                    | 0,491440                                                                                                                                                                                   | 1,000000              |                       | 1,000000           | 1,000000                   | 0,121836            |
| Javett                       | 0,016893                                                                                                                                                                                   | 1,000000              | 1,000000              |                    | 0,074236                   | 1,000000            |
| Javett Control               | 1,000000                                                                                                                                                                                   | 1,000000              | 1,000000              | 0,074236           |                            | 0,000218            |
| Monocot                      | 0,000026                                                                                                                                                                                   | 0,096983              | 0,121836              | 1,000000           | 0,000218                   |                     |

## 2. Richness

| Depend.:<br><b>Richness</b> | Multiple Comparisons p values (2-tailed); <b>Richness</b> (Spring Pitfall Data)<br>Independent (grouping) variable: Garden Type<br>Kruskal-Wallis test: H (5, N= 42) =18,08343 p =0,0028 |                       |                       |                    |                            |                     |
|-----------------------------|------------------------------------------------------------------------------------------------------------------------------------------------------------------------------------------|-----------------------|-----------------------|--------------------|----------------------------|---------------------|
|                             | FA Control<br>R:13,571                                                                                                                                                                   | FA Native<br>R:35,929 | Grassland<br>R:25,214 | Javett<br>R:23,643 | Javett Control<br>R:12,143 | Monocot<br>R:18,500 |
| FA Control                  |                                                                                                                                                                                          | 0,009765              | 1,000000              | 1,000000           | 1,000000                   | 1,000000            |
| FA Native                   | 0,009765                                                                                                                                                                                 |                       | 1,000000              | 0,914879           | 0,004296                   | 0,117968            |
| Grassland                   | 1,000000                                                                                                                                                                                 | 1,000000              |                       | 1,000000           | 0,693307                   | 1,000000            |
| Javett                      | 1,000000                                                                                                                                                                                 | 0,914879              | 1,000000              |                    | 1,000000                   | 1,000000            |
| Javett Control              | 1,000000                                                                                                                                                                                 | 0,004296              | 0,693307              | 1,000000           |                            | 1,000000            |
| Monocot                     | 1,000000                                                                                                                                                                                 | 0,117968              | 1,000000              | 1,000000           | 1,000000                   |                     |

## 3. Shannon Diversity

| Depend.:<br><b>Shannon Diversity</b> | Multiple Comparisons p values (2-tailed); <b>Shannon Diversity</b> (Spring Pitfall Data)<br>Independent (grouping) variable: Garden Type<br>Kruskal-Wallis test: H (5, N= 42) =27,91979 p = 0,0001 |                       |                       |                    |                            |                     |
|--------------------------------------|----------------------------------------------------------------------------------------------------------------------------------------------------------------------------------------------------|-----------------------|-----------------------|--------------------|----------------------------|---------------------|
|                                      | FA Control<br>R:22,429                                                                                                                                                                             | FA Native<br>R:37,571 | Grassland<br>R:23,857 | Javett<br>R:16,857 | Javett Control<br>R:24,286 | Monocot<br>R:4,0000 |
| FA Control                           |                                                                                                                                                                                                    | 0,313934              | 1,000000              | 1,000000           | 1,000000                   | 0,074236            |
| FA Native                            | 0,313934                                                                                                                                                                                           |                       | 0,547371              | 0,023755           | 0,641391                   | 0,000005            |
| Grassland                            | 1,000000                                                                                                                                                                                           | 0,547371              |                       | 1,000000           | 1,000000                   | 0,036904            |
| Javett                               | 1,000000                                                                                                                                                                                           | 0,023755              | 1,000000              |                    | 1,000000                   | 0,748718            |
| Javett Control                       | 1,000000                                                                                                                                                                                           | 0,641391              | 1,000000              | 1,000000           |                            | 0,029667            |
| Monocot                              | 0,074236                                                                                                                                                                                           | 0,000005              | 0,036904              | 0,748718           | 0,029667                   |                     |

## 4. Simpson Diversity

| Depend.:<br><b>Simpson Diversity</b> | Multiple Comparisons p values (2-tailed); <b>Simpson Diversity</b> (Spring Pitfall Data)<br>Independent (grouping) variable: Garden Type<br>Kruskal-Wallis test: H (5, N= 42) =31,17576 p = 0,0001 |                       |                       |                    |                            |                     |
|--------------------------------------|----------------------------------------------------------------------------------------------------------------------------------------------------------------------------------------------------|-----------------------|-----------------------|--------------------|----------------------------|---------------------|
|                                      | FA Control<br>R:31,500                                                                                                                                                                             | FA Native<br>R:33,429 | Grassland<br>R:19,000 | Javett<br>R:13,000 | Javett Control<br>R:28,071 | Monocot<br>R:4,0000 |
| FA Control                           |                                                                                                                                                                                                    | 1,000000              | 0,849301              | 0,071761           | 1,000000                   | 0,000412            |
| FA Native                            | 1,000000                                                                                                                                                                                           |                       | 0,416745              | 0,027561           | 1,000000                   | 0,000108            |
| Grassland                            | 0,849301                                                                                                                                                                                           | 0,416745              |                       | 1,000000           | 1,000000                   | 0,332519            |
| Javett                               | 0,071761                                                                                                                                                                                           | 0,027561              | 1,000000              |                    | 0,323110                   | 1,000000            |
| Javett Control                       | 1,000000                                                                                                                                                                                           | 1,000000              | 1,000000              | 0,323110           |                            | 0,003626            |
| Monocot                              | 0,000412                                                                                                                                                                                           | 0,000108              | 0,332519              | 1,000000           | 0,003626                   |                     |

## SUMMER PITFALL EFFECT of AGE

### 1. Abundance

| Multiple Comparisons p values (2-tailed); <b>Abundance</b> (Summer Pitfall Data)<br>Independent (grouping) variable: Age<br>Kruskal-Wallis test: $H(2, N=42) = 28,12265$ $p = 0,0001$ |                   |                 |                      |
|---------------------------------------------------------------------------------------------------------------------------------------------------------------------------------------|-------------------|-----------------|----------------------|
| Depend.:<br><b>Abundance</b>                                                                                                                                                          | Young<br>R:16,500 | Old<br>R:35,500 | Youngest<br>R:12,500 |
| Young                                                                                                                                                                                 |                   | 0,000125        | 1,000000             |
| Old                                                                                                                                                                                   | 0,000125          |                 | 0,000002             |
| Youngest                                                                                                                                                                              | 1,000000          | 0,000002        |                      |

### 2. Richness

| Multiple Comparisons p values (2-tailed); <b>Richness</b> (Summer Pitfall Data)<br>Independent (grouping) variable: Age<br>Kruskal-Wallis test: $H(2, N=42) = 12,51179$ $p = 0,0019$ |                   |                 |                      |
|--------------------------------------------------------------------------------------------------------------------------------------------------------------------------------------|-------------------|-----------------|----------------------|
| Depend.:<br><b>Richness</b>                                                                                                                                                          | Young<br>R:19,857 | Old<br>R:30,357 | Youngest<br>R:14,286 |
| Young                                                                                                                                                                                |                   | 0,070632        | 0,688596             |
| Old                                                                                                                                                                                  | 0,070632          |                 | 0,001584             |
| Youngest                                                                                                                                                                             | 0,688596          | 0,001584        |                      |

### 3. Shannon Diversity

| Multiple Comparisons p values (2-tailed); <b>Shannon Diversity</b> (Summer Pitfall Data)<br>Independent (grouping) variable: Age<br>Kruskal-Wallis test: $H(2, N=42) = 23,33266$ $p = 0,0001$ |                   |                |                      |
|-----------------------------------------------------------------------------------------------------------------------------------------------------------------------------------------------|-------------------|----------------|----------------------|
| Depend.:<br><b>Shannon Diversity</b>                                                                                                                                                          | Young<br>R:28,000 | Old<br>R:8,571 | Youngest<br>R:27,929 |
| Young                                                                                                                                                                                         |                   | 0,000084       | 1,000000             |
| Old                                                                                                                                                                                           | 0,000084          |                | 0,000090             |
| Youngest                                                                                                                                                                                      | 1,000000          | 0,000090       |                      |

### 4. Simpson Diversity

| Multiple Comparisons p values (2-tailed); <b>Simpson Diversity</b> (Summer Pitfall Data)<br>Independent (grouping) variable: Age<br>Kruskal-Wallis test: $H(2, N=42) = 28,04133$ $p = 0,0001$ |                   |                 |                      |
|-----------------------------------------------------------------------------------------------------------------------------------------------------------------------------------------------|-------------------|-----------------|----------------------|
| Depend.:<br><b>Simpson Diversity</b>                                                                                                                                                          | Young<br>R:25,536 | Old<br>R:7,7143 | Youngest<br>R:31,250 |
| Young                                                                                                                                                                                         |                   | 0,000364        | 0,653428             |
| Old                                                                                                                                                                                           | 0,000364          |                 | 0,000001             |
| Youngest                                                                                                                                                                                      | 0,653428          | 0,000001        |                      |

## WINTER PITFALL EFFECT of AGE

### 1. Abundance

| Multiple Comparisons p values (2-tailed); <b>Abundance</b> (Winter Pitfall Data)<br>Independent (grouping) variable: Age<br>Kruskal-Wallis test: $H(2, N=24) = 14,57259$ $p = 0,0007$ |                   |                  |                      |
|---------------------------------------------------------------------------------------------------------------------------------------------------------------------------------------|-------------------|------------------|----------------------|
| Depend.:<br><b>Abundance</b>                                                                                                                                                          | Young<br>R:9,3125 | Old<br>R:20,2500 | Youngest<br>R:7,9375 |
| Young                                                                                                                                                                                 |                   | 0,005932         | 1,000000             |
| Old                                                                                                                                                                                   | 0,005932          |                  | 0,001490             |
| Youngest                                                                                                                                                                              | 1,000000          | 0,001490         |                      |

### 2. Richness

| Multiple Comparisons p values (2-tailed); <b>Richness</b> (Winter Pitfall Data)<br>Independent (grouping) variable: Age<br>Kruskal-Wallis test: $H(2, N=24) = 8,072357$ $p = 0,0177$ |                   |                  |                       |
|--------------------------------------------------------------------------------------------------------------------------------------------------------------------------------------|-------------------|------------------|-----------------------|
| Depend.:<br><b>Richness</b>                                                                                                                                                          | Young<br>R:12,875 | Old<br>R: 17,313 | Youngest<br>R: 7,3125 |
| Young                                                                                                                                                                                |                   | 0,628312         | 0,346939              |
| Old                                                                                                                                                                                  | 0,628312          |                  | 0,014033              |
| Youngest                                                                                                                                                                             | 0,346939          | 0,014033         |                       |

### 3. Shannon Diversity

| Multiple Comparisons p values (2-tailed); <b>Shannon Diversity</b> (Winter Pitfall Data)<br>Independent (grouping) variable: Age<br>Kruskal-Wallis test: $H(2, N=24) = 11,28500$ $p = 0,0035$ |                    |                  |                        |
|-----------------------------------------------------------------------------------------------------------------------------------------------------------------------------------------------|--------------------|------------------|------------------------|
| Depend.:<br><b>Shannon Diversity</b>                                                                                                                                                          | Young<br>R:18,3750 | Old<br>R: 6,5000 | Youngest<br>R: 12,6250 |
| Young                                                                                                                                                                                         |                    | 0,002349         | 0,311628               |
| Old                                                                                                                                                                                           | 0,002349           |                  | 0,249601               |
| Youngest                                                                                                                                                                                      | 0,311628           | 0,249601         |                        |

### 4. Simpson Index

| Multiple Comparisons p values (2-tailed); <b>Simpson Diversity</b> (Winter Pitfall Data)<br>Independent (grouping) variable: Age<br>Kruskal-Wallis test: $H(2, N=24) = 13,76000$ $p = 0,0010$ |                    |                  |                        |
|-----------------------------------------------------------------------------------------------------------------------------------------------------------------------------------------------|--------------------|------------------|------------------------|
| Depend.:<br><b>Simpson Diversity</b>                                                                                                                                                          | Young<br>R:18,5000 | Old<br>R: 5,5000 | Youngest<br>R: 13,5000 |
| Young                                                                                                                                                                                         |                    | 0,000708         | 0,471898               |
| Old                                                                                                                                                                                           | 0,000708           |                  | 0,070955               |
| Youngest                                                                                                                                                                                      | 0,471898           | 0,070955         |                        |

## SPRING PITFALL EFFECT of AGE

### 1. Abundance

| Multiple Comparisons p values (2-tailed); <b>Abundance</b> (Spring Pitfall Data)<br>Independent (grouping) variable: Age<br>Kruskal-Wallis test: $H(2, N=42) = 12,21789$ $p = 0,0022$ |                   |                 |                      |
|---------------------------------------------------------------------------------------------------------------------------------------------------------------------------------------|-------------------|-----------------|----------------------|
| Depend.:<br><b>Abundance</b>                                                                                                                                                          | Young<br>R:14,393 | Old<br>R:30,321 | Youngest<br>R:19,786 |
| Young                                                                                                                                                                                 |                   | 0,001776        | 0,734423             |
| Old                                                                                                                                                                                   | 0,001776          |                 | 0,069225             |
| Youngest                                                                                                                                                                              | 0,734423          | 0,069225        |                      |

### 2. Richness

| Multiple Comparisons p values (2-tailed); <b>Richness</b> (Spring Pitfall Data)<br>Independent (grouping) variable: Age<br>Kruskal-Wallis test: $H(2, N=42) = 2,220809$ $p = 0,3294$ |                   |                 |                      |
|--------------------------------------------------------------------------------------------------------------------------------------------------------------------------------------|-------------------|-----------------|----------------------|
| Depend.:<br><b>Richness</b>                                                                                                                                                          | Young<br>R:24,750 | Old<br>R:21,857 | Youngest<br>R:17,893 |
| Young                                                                                                                                                                                |                   | 1,000000        | 0,417542             |
| Old                                                                                                                                                                                  | 1,000000          |                 | 1,000000             |
| Youngest                                                                                                                                                                             | 0,417542          | 1,000000        |                      |

### 3. Shannon Diversity

| Multiple Comparisons p values (2-tailed); <b>Shannon Diversity</b> (Spring Pitfall Data)<br>Independent (grouping) variable: Age<br>Kruskal-Wallis test: $H(2, N=42) = 12,13384$ $p = 0,0023$ |                   |                 |                      |
|-----------------------------------------------------------------------------------------------------------------------------------------------------------------------------------------------|-------------------|-----------------|----------------------|
| Depend.:<br><b>Shannon Diversity</b>                                                                                                                                                          | Young<br>R:30,000 | Old<br>R:13,929 | Youngest<br>R:20,571 |
| Young                                                                                                                                                                                         |                   | 0,001584        | 0,126031             |
| Old                                                                                                                                                                                           | 0,001584          |                 | 0,455886             |
| Youngest                                                                                                                                                                                      | 0,126031          | 0,455886        |                      |

### 4. Simpson Diversity

| Multiple Comparisons p values (2-tailed); <b>Simpson Diversity</b> (Spring Pitfall Data)<br>Independent (grouping) variable: Age<br>Kruskal-Wallis test: $H(2, N=42) = 20,57333$ $p = 0,0001$ |                   |                 |                      |
|-----------------------------------------------------------------------------------------------------------------------------------------------------------------------------------------------|-------------------|-----------------|----------------------|
| Depend.:<br><b>Simpson Diversity</b>                                                                                                                                                          | Young<br>R:32,464 | Old<br>R:11,500 | Youngest<br>R:20,536 |
| Young                                                                                                                                                                                         |                   | 0,000018        | 0,030283             |
| Old                                                                                                                                                                                           | 0,000018          |                 | 0,153997             |
| Youngest                                                                                                                                                                                      | 0,030283          | 0,153997        |                      |
